# Supplementary material for: Indole Diterpene Derivatives from the Aspergillus flavus GZWMJZ-288, an Endophytic Fungus from Garcinia multiflora
Source: MDPI journal article supplement (doi:10.3390/molecules28237931), 2023-12-04

# Indole diterpene derivatives from the *Aspergillus flavus* GZWMJZ-288, an endophytic fungus from *Garcinia multiflora*

Dongyang Wang<sup>1,2,†</sup>, Xiaohong Zhuang<sup>1,2,3,†</sup>, Ying Yin<sup>1,2,3,†</sup>, Dan Wu<sup>1,2</sup>, Wenwen He<sup>1,2</sup>, Weiming Zhu<sup>1,4</sup>, Yanchao Xu<sup>1,3</sup>, Mingxing Zuo<sup>1,2,\*</sup> and Liping Wang<sup>1,2,3,\*</sup>

<sup>1</sup> State Key Laboratory of Functions and Applications of Medicinal Plants, Guizhou Medical University, Guiyang 550014, China; wangdongyang@gmc.edu.cn (Dongyang Wang)

<sup>2</sup> Natural Products Research Center of Guizhou Province, Guiyang 550014, China

<sup>3</sup> School of Pharmaceutical Sciences, Guizhou Medical University, Guiyang 550025, China

<sup>4</sup> School of Medicine and Pharmacy, Ocean University of China, Qingdao 266003, China

\* Correspondence: zuomingxing@gmc.edu.cn (M.Z.); wangliping2022@gmc.edu.cn (L.W.)

† These authors contributed equally to the work.

**Table S1.** The X-ray single crystal experimental details.

| Crystal data                                                                                                            | Compound 2 (CCDC 2222865)                                     |
|-------------------------------------------------------------------------------------------------------------------------|---------------------------------------------------------------|
| Chemical formula                                                                                                        | C <sub>28</sub> H <sub>39</sub> O <sub>3</sub> N              |
| <i>M<sub>r</sub></i>                                                                                                    | 437.60                                                        |
| Crystal system, space group                                                                                             | Monoclinic, <i>P</i> 2 <sub>1</sub>                           |
| Temperature (K)                                                                                                         | 150                                                           |
| <i>a</i> , <i>b</i> , <i>c</i> (Å)                                                                                      | 9.3756 (3), 10.4260 (4), 12.5667 (5)                          |
| $\alpha$ , $\beta$ , $\gamma$ (°)                                                                                       | 90, 96.673 (2), 90                                            |
| <i>V</i> (Å <sup>3</sup> )                                                                                              | 1220.07 (8)                                                   |
| <i>Z</i>                                                                                                                | 2                                                             |
| Radiation                                                                                                               | CuK $\alpha$ ( $\lambda$ = 1.54178)                           |
| $\mu$ /mm <sup>-1</sup>                                                                                                 | 0.595                                                         |
| Crystal size (mm <sup>3</sup> )                                                                                         | 0.2 × 0.15 × 0.1                                              |
| Data collection                                                                                                         |                                                               |
| Diffractometer                                                                                                          | Bruker D8 goniometer with CCD area detector                   |
| Absorption correction                                                                                                   | Multi-scan<br><i>SADABS</i>                                   |
| <i>T<sub>min</sub></i> , <i>T<sub>max</sub></i>                                                                         | 0.898, 0.942                                                  |
| No. of measured, independent and observed [ <i>I</i> > 2 $\sigma$ ( <i>I</i> )] reflections                             | 10667, 4676, 4676                                             |
| <i>R<sub>int</sub></i>                                                                                                  | 0.0407                                                        |
| Refinement                                                                                                              |                                                               |
| <i>R</i> [ <i>F</i> <sup>2</sup> > 2 $\sigma$ ( <i>F</i> <sup>2</sup> )], <i>wR</i> ( <i>F</i> <sup>2</sup> ), <i>S</i> | 0.0710, 0.1633                                                |
| No. of data                                                                                                             | 4676                                                          |
| No. of parameters                                                                                                       | 296                                                           |
| No. of restraints                                                                                                       | 2                                                             |
| Largest diff. peak/hole (e Å <sup>-3</sup> )                                                                            | 0.48, -0.21                                                   |
| Index ranges                                                                                                            | -11 ≤ <i>h</i> ≤ 11, -12 ≤ <i>k</i> ≤ 12, -15 ≤ <i>l</i> ≤ 15 |
| Flack parameter                                                                                                         | 0.06 (13)                                                     |

A suitable crystal was selected and on a Bruker APEX-II CCD diffractometer. The crystal was kept at 150.00 K during data collection. Using Olex2, the structure was solved with the SHELXT structure solution program using Intrinsic Phasing and refined with the SHELXL refinement package using Least Squares minimisation.

**Table S2.** Geometric parameters (Å, °).

| Ato<br>m  | -<br>Atom | Length/Å | Ato<br>m  | -<br>Atom | Length/Å |
|-----------|-----------|----------|-----------|-----------|----------|
| O001-C00F |           | 1.431(4) | C00B-C00D |           | 1.592(4) |
| O002-C00K |           | 1.443(4) | C00B-C00K |           | 1.560(4) |
| O003-C00V |           | 1.426(4) | C00B-C00L |           | 1.575(4) |
| N004-C005 |           | 1.368(4) | C00B-C00U |           | 1.542(5) |
| N004-C00E |           | 1.367(5) | C00C-C00E |           | 1.369(5) |
| C005-C00I |           | 1.403(4) | C00C-C00I |           | 1.441(4) |
| C005-C00M |           | 1.398(5) | C00D-C00F |           | 1.557(4) |
| C006-C00A |           | 1.528(4) | C00D-C00H |           | 1.554(4) |
| C006-C00D |           | 1.561(4) | C00F-C00O |           | 1.525(4) |
| C006-C00J |           | 1.566(4) | C00G-C00H |           | 1.538(4) |
| C007-C008 |           | 1.522(4) | C00I-C00N |           | 1.410(5) |
| C007-C00V |           | 1.513(5) | C00J-C00S |           | 1.541(5) |
| C007-C00W |           | 1.527(5) | C00L-C00P |           | 1.543(4) |
| C008-C00A |           | 1.337(4) | C00L-C00Q |           | 1.534(4) |
| C008-C00G |           | 1.511(5) | C00M-C00R |           | 1.381(6) |
| C009-C00J |           | 1.529(5) | C00N-C00T |           | 1.379(5) |
| C009-C00K |           | 1.508(5) | C00O-C00Q |           | 1.513(4) |
| C00A-C00C |           | 1.489(4) | C00R-C00T |           | 1.408(6) |

  

| Ato<br>m       | -Atom-<br>Atom | Length/Å | Ato<br>m       | -Atom-<br>Atom | Length/Å |
|----------------|----------------|----------|----------------|----------------|----------|
| C00E-N004-C005 |                | 108.9(3) | C00H-C00D-C006 |                | 106.9(2) |
| N004-C005-C00I |                | 107.8(3) | C00H-C00D-C00B |                | 113.6(2) |
| N004-C005-C00M |                | 129.5(3) | C00H-C00D-C00F |                | 106.6(2) |
| C00M-C005-C00I |                | 122.7(3) | N004-C00E-C00C |                | 110.5(3) |
| C00A-C006-C00D |                | 112.4(2) | O001-C00F-C00D |                | 109.5(2) |
| C00A-C006-C00J |                | 109.9(2) | O001-C00F-C00O |                | 109.5(2) |
| C00D-C006-C00J |                | 117.0(3) | C00O-C00F-C00D |                | 114.3(2) |
| C008-C007-C00W |                | 111.3(3) | C008-C00G-C00H |                | 115.3(3) |
| C00V-C007-C008 |                | 111.3(3) | C00G-C00H-C00D |                | 111.9(2) |
| C00V-C007-C00W |                | 111.7(3) | C005-C00I-C00C |                | 107.3(3) |
| C00A-C008-C007 |                | 121.6(3) | C005-C00I-C00N |                | 118.8(3) |
| C00A-C008-C00G |                | 121.8(3) | C00N-C00I-C00C |                | 133.9(3) |
| C00G-C008-C007 |                | 116.5(3) | C009-C00J-C006 |                | 110.7(3) |
| C00K-C009-C00J |                | 111.6(3) | C009-C00J-C00S |                | 110.3(3) |
| C008-C00A-C006 |                | 122.9(3) | C00S-C00J-C006 |                | 116.6(3) |
| C008-C00A-C00C |                | 122.3(3) | O002-C00K-C009 |                | 111.3(2) |
| C00C-C00A-C006 |                | 114.7(3) | O002-C00K-C00B |                | 114.1(3) |
| C00K-C00B-C00D |                | 106.6(2) | C009-C00K-C00B |                | 113.3(3) |
| C00K-C00B-C00L |                | 111.9(2) | C00P-C00L-C00B |                | 115.2(3) |
| C00L-C00B-C00D |                | 109.2(2) | C00Q-C00L-C00B |                | 111.6(2) |
| C00U-C00B-C00D |                | 112.7(2) | C00Q-C00L-C00P |                | 108.2(3) |
| C00U-C00B-C00K |                | 107.2(3) | C00R-C00M-C005 |                | 117.2(3) |
| C00U-C00B-C00L |                | 109.3(3) | C00T-C00N-C00I |                | 118.9(3) |
| C00E-C00C-C00A |                | 127.5(3) | C00Q-C00O-C00F |                | 111.7(3) |
| C00E-C00C-C00I |                | 105.6(3) | C00O-C00Q-C00L |                | 110.9(3) |
| C00I-C00C-C00A |                | 126.8(3) | C00M-C00R-C00T |                | 121.4(3) |
| C006-C00D-C00B |                | 110.9(2) | C00N-C00T-C00R |                | 121.0(3) |
| C00F-C00D-C006 |                | 107.7(2) | O003-C00V-C007 |                | 109.7(3) |

| C00F-C00D-C00B      |                     |           | 111.0(2)            |                     |           |
|---------------------|---------------------|-----------|---------------------|---------------------|-----------|
| Ato<br>m            | -Atom-Atom-<br>Atom | Length/Å  | Ato<br>m            | -Atom-Atom-<br>Atom | Length/Å  |
| O001-C00F-C00O-C00Q |                     | 70.1(3)   | C00E-C00C-C00I-C00N |                     | -178.7(3) |
| N004-C005-C00I-C00C |                     | -0.4(3)   | C00F-C00D-C00H-C00G |                     | 55.0(3)   |
| N004-C005-C00I-C00N |                     | 178.6(3)  | C00F-C00O-C00Q-C00L |                     | 56.6(4)   |
| N004-C005-C00M-C00R |                     | -177.1(3) | C00G-C008-C00A-C006 |                     | -1.2(5)   |
| C005-N004-C00E-C00C |                     | -0.6(4)   | C00G-C008-C00A-C00C |                     | -179.9(3) |
| C005-C00I-C00N-C00T |                     | -0.9(5)   | C00H-C00D-C00F-O001 |                     | 51.5(3)   |
| C005-C00M-C00R-C00T |                     | -1.2(5)   | C00H-C00D-C00F-C00O |                     | 174.8(3)  |
| C006-C00A-C00C-C00E |                     | 92.7(4)   | C00I-C005-C00M-C00R |                     | 0.7(5)    |
| C006-C00A-C00C-C00I |                     | -84.4(4)  | C00I-C00C-C00E-N004 |                     | 0.3(3)    |
| C006-C00D-C00F-O001 |                     | 165.9(2)  | C00I-C00N-C00T-C00R |                     | 0.4(5)    |
| C006-C00D-C00F-C00O |                     | -70.9(3)  | C00J-C006-C00A-C008 |                     | 109.2(3)  |
| C006-C00D-C00H-C00G |                     | -59.9(3)  | C00J-C006-C00A-C00C |                     | -72.0(3)  |
| C007-C008-C00A-C006 |                     | 175.0(3)  | C00J-C006-C00D-C00B |                     | 47.5(3)   |
| C007-C008-C00A-C00C |                     | -3.7(5)   | C00J-C006-C00D-C00F |                     | 169.1(2)  |
| C007-C008-C00G-C00H |                     | 177.2(3)  | C00J-C006-C00D-C00H |                     | -76.8(3)  |
| C008-C007-C00V-O003 |                     | -166.3(3) | C00J-C009-C00K-O002 |                     | 167.1(2)  |
| C008-C00A-C00C-C00E |                     | -88.5(4)  | C00J-C009-C00K-C00B |                     | -62.8(3)  |
| C008-C00A-C00C-C00I |                     | 94.4(4)   | C00K-C009-C00J-C006 |                     | 50.3(4)   |
| C008-C00G-C00H-C00D |                     | 38.2(4)   | C00K-C009-C00J-C00S |                     | -80.3(3)  |
| C00A-C006-C00D-C00B |                     | 176.0(2)  | C00K-C00B-C00D-C006 |                     | -52.5(3)  |
| C00A-C006-C00D-C00F |                     | -62.4(3)  | C00K-C00B-C00D-C00F |                     | -172.1(2) |
| C00A-C006-C00D-C00H |                     | 51.8(3)   | C00K-C00B-C00D-C00H |                     | 67.8(3)   |
| C00A-C006-C00J-C009 |                     | -174.8(2) | C00K-C00B-C00L-C00P |                     | -61.7(4)  |
| C00A-C006-C00J-C00S |                     | -47.6(4)  | C00K-C00B-C00L-C00Q |                     | 174.4(3)  |
| C00A-C008-C00G-C00H |                     | -6.5(4)   | C00L-C00B-C00D-C006 |                     | 68.5(3)   |
| C00A-C00C-C00E-N004 |                     | -177.2(3) | C00L-C00B-C00D-C00F |                     | -51.1(3)  |
| C00A-C00C-C00I-C005 |                     | 177.7(3)  | C00L-C00B-C00D-C00H |                     | -171.1(3) |
| C00A-C00C-C00I-C00N |                     | -1.2(5)   | C00L-C00B-C00K-O002 |                     | 71.8(3)   |
| C00B-C00D-C00F-O001 |                     | -72.6(3)  | C00L-C00B-C00K-C009 |                     | -56.9(3)  |
| C00B-C00D-C00F-C00O |                     | 50.7(3)   | C00M-C005-C00I-C00C |                     | -178.7(3) |
| C00B-C00D-C00H-C00G |                     | 177.5(3)  | C00M-C005-C00I-C00N |                     | 0.4(5)    |
| C00B-C00L-C00Q-C00O |                     | -59.8(4)  | C00M-C00R-C00T-C00N |                     | 0.7(6)    |
| C00C-C00I-C00N-C00T |                     | 177.8(3)  | C00P-C00L-C00Q-C00O |                     | 172.4(3)  |
| C00D-C006-C00A-C008 |                     | -23.0(4)  | C00U-C00B-C00D-C006 |                     | -169.8(3) |
| C00D-C006-C00A-C00C |                     | 155.8(3)  | C00U-C00B-C00D-C00F |                     | 70.5(3)   |
| C00D-C006-C00J-C009 |                     | -45.1(4)  | C00U-C00B-C00D-C00H |                     | -49.5(3)  |
| C00D-C006-C00J-C00S |                     | 82.1(4)   | C00U-C00B-C00K-O002 |                     | -48.0(3)  |
| C00D-C00B-C00K-O002 |                     | -168.9(2) | C00U-C00B-C00K-C009 |                     | -176.7(3) |
| C00D-C00B-C00K-C009 |                     | 62.4(3)   | C00U-C00B-C00L-C00P |                     | 56.8(4)   |
| C00D-C00B-C00L-C00P |                     | -179.5(3) | C00U-C00B-C00L-C00Q |                     | -67.1(3)  |
| C00D-C00B-C00L-C00Q |                     | 56.6(4)   | C00V-C007-C008-C00A |                     | 121.8(4)  |
| C00D-C00F-C00O-C00Q |                     | -53.2(4)  | C00V-C007-C008-C00G |                     | -61.8(4)  |
| C00E-N004-C005-C00I |                     | 0.6(3)    | C00W-C007-C008-C00A |                     | -112.8(4) |
| C00E-N004-C005-C00M |                     | 178.7(3)  | C00W-C007-C008-C00G |                     | 63.6(4)   |
| C00E-C00C-C00I-C005 |                     | 0.1(3)    | C00W-C007-C00V-O003 |                     | 68.6(4)   |

**Table S3.** Hydrogen Atom Coordinates and Isotropic Displacement Parameters.

| Atom | <i>x</i> | <i>y</i> | <i>z</i> | U(eq) |
|------|----------|----------|----------|-------|
| H001 | 1358.98  | 1335.02  | 7097.79  | 76    |
| H002 | 8280.04  | 2819.32  | 8887.46  | 79    |
| H003 | 938.16   | 6788.82  | 2766.66  | 85    |
| H004 | 2822.48  | 9601.31  | 7184.8   | 59    |
| H006 | 3843.03  | 4849.67  | 8149.19  | 51    |
| H007 | 1049.32  | 6340.24  | 5331.41  | 57    |
| H00A | 7736.55  | 4873.08  | 7952.94  | 59    |
| H00B | 6661     | 4674.86  | 8840.37  | 59    |
| H00E | 3918.81  | 7885.66  | 6266.57  | 59    |
| H00F | 1780.83  | 3298.36  | 7176.58  | 53    |
| H00C | 3036.38  | 3522.93  | 4648.09  | 59    |
| H00D | 1941.51  | 2914.46  | 5390.49  | 59    |
| H00G | 4968.69  | 3169.02  | 5870.12  | 55    |
| H00H | 4016.4   | 1915.08  | 5994.76  | 55    |
| H00J | 5569.8   | 6151.47  | 7720.81  | 57    |
| H00K | 6717.67  | 3055.7   | 7035.26  | 57    |
| H00L | 4993.69  | 3635.36  | 9404.64  | 57    |
| H00M | 734.03   | 9855.15  | 8551.97  | 65    |
| H00N | 550.15   | 5336.19  | 8160.62  | 61    |
| H00I | 2325.91  | 3779.17  | 8971.88  | 58    |
| H00O | 1391.84  | 2489.75  | 8898.81  | 58    |
| H00P | 6315.27  | 1205.56  | 9913.94  | 91    |
| H00Q | 5781.99  | 2111.85  | 10816.5  | 91    |
| H00R | 7026.1   | 2588.92  | 10140    | 91    |
| H00S | 3464.1   | 1248.45  | 9325.6   | 62    |
| H00T | 3382     | 2311.22  | 10237.5  | 62    |
| H00U | -781.47  | 8611.11  | 9490.85  | 71    |
| H00V | 6875.97  | 6143.85  | 6314.71  | 86    |
| H00W | 5269.09  | 5871.42  | 5784.48  | 86    |
| H00X | 6396.2   | 4717.13  | 5966.15  | 86    |
| H00Y | -887.19  | 6381.52  | 9281.24  | 70    |
| H00Z | 4570.44  | 594.89   | 8082.51  | 75    |
| H    | 6284.12  | 710.47   | 8228.39  | 75    |
| HA   | 5402.52  | 908.94   | 7071.29  | 75    |
| H00  | 2579.76  | 6016.79  | 3937.12  | 75    |
| HB   | 1558.07  | 4846.88  | 3511.42  | 75    |
| H1   | -189.15  | 3956.36  | 4592.16  | 106   |
| HC   | -1019.02 | 5288.07  | 4671.37  | 106   |
| HD   | -399.93  | 4543.89  | 5739.97  | 106   |

**Table S4.** <sup>1</sup>H (600 MHz) and <sup>13</sup>C (150 MHz) NMR data of compounds 3-6.

| Positio<br>n | 3          |                        | 4          |                        | 5          |                        | 6          |                        |
|--------------|------------|------------------------|------------|------------------------|------------|------------------------|------------|------------------------|
|              | $\delta_C$ | $\delta_H$ , (J in Hz) |
| 2            | 122.<br>0  | 6.91, d, (2.3)         | 123.<br>5  | 7.06, d, (2.2)         | 138.<br>5  |                        | 121.<br>4  | 6.89, d, (1.8)         |
| 3            | 116.<br>6  |                        | 118.<br>3  |                        | 118.<br>8  |                        | 119.<br>5  |                        |

|    |       |                              |       |                                                   |       |                                       |       |                              |
|----|-------|------------------------------|-------|---------------------------------------------------|-------|---------------------------------------|-------|------------------------------|
| 4  | 127.0 |                              | 127.0 |                                                   | 123.2 |                                       | 127.7 |                              |
| 5  | 118.4 | 7.41, d, (8.0)               | 117.4 | 7.35, d, (8.1)                                    | 121.8 | 8.03, d, (7.9)                        | 119.7 | 7.44, d, (8.2)               |
| 6  | 118.5 | 7.09, td, (7.5, 0.9)         | 114.6 | 7.19, td, (7.4, 0.8)                              | 119.6 | 7.29, td, (7.9, 1.1)                  | 118.7 | 7.09, td, (7.5, 0.6)         |
| 7  | 120.8 | 7.19, td, (7.2, 0.8)         | 120.6 | 7.12, td, (7.5, 0.9)                              | 124.5 | 7.40, td, (7.2, 0.8)                  | 121.9 | 7.19, dt, (7.0, 0.7)         |
| 8  | 111.5 | 7.38, d, (7.8)               | 111.5 | 7.53, d, (7.8)                                    | 110.8 | 7.42, d, (7.5)                        | 111.2 | 7.37, d, (8.2)               |
| 9  | 135.9 |                              | 135.9 |                                                   | 139.6 |                                       | 136.0 |                              |
| 10 | 125.5 |                              | 33.9  | 3.66, dd, (12.5, 5.5)                             | 34.7  |                                       | 125.6 |                              |
| 11 | 43.1  | 2.48, d, (6.2)               | 38.4  | 2.68, ddd, (5.2, 5.2, 0.8)                        | 38.9  | 4.22, dd, (6.4, 1.3)                  | 43.6  | 2.44, d, (4.8)               |
| 12 | 29.8  | 1.50-1.52, m                 | 27.2  | 1.61-1.66, m                                      | 31.5  | 2.86-2.91, m                          | 31.4  | 1.95-1.99, m                 |
| 13 | 35.4  | 0.84-0.88, m<br>1.72-1.84, m | 37.3  | 1.21, dddd, (12.5, 2.8, 2.8, 0.8)<br>1.74-1.83, m | 35.4  | 2.40-2.43, m<br>1.73, dd, (12.4, 1.8) | 25.8  | 1.63-1.65, m<br>1.15-1.18, m |
| 14 | 69.4  | 4.48-4.81, m                 | 69.5  | 4.66-4.69, m                                      | 72.3  | 4.26, dd, (12.8, 3.2)                 | 27.7  | 1.55-1.58, m<br>1.19-1.22, m |
| 15 | 42.9  |                              | 42.6  |                                                   | 43.8  |                                       | 38.6  |                              |
| 16 | 30.2  | 2.21-2.25, m                 | 30.6  | 2.19-2.24, m                                      | 31.4  | 2.61-2.66, m                          | 29.2  | 2.03-2.08, m                 |
| 17 | 29.3  | 1.17-1.20, m<br>1.72-1.84, m | 30.0  | 1.74-1.83, m<br>1.33-1.34, overlap                | 27.3  | 1.27-1.30, m<br>1.78-1.84, m          | 25.5  | 1.25-1.27, m<br>1.65-1.68, m |
| 18 | 31.0  | 1.24-1.26, m<br>1.72-1.84, m | 31.0  | 1.74-1.83, m<br>1.33-1.34, overlap                | 24.5  | 1.32-1.39, m<br>1.87-1.93, m          | 21.9  | 1.74-1.78, m<br>2.03-2.08, m |
| 19 | 68.0  | 4.04, dd, (12.4, 3.5)        | 66.1  | 3.98, dd, (12.3, 2.7)                             | 71.0  | 3.88, dd, (2.6, 2.6)                  | 71.3  | 4.49, bs                     |
| 20 | 44.0  |                              | 45.4  |                                                   | 44.0  |                                       | 42.5  |                              |
| 21 | 21.6  | 1.88-1.92, m<br>2.12-2.25, m | 24.3  | 1.84-1.92, m<br>2.11-2.15, m                      | 22.0  | 2.16-2.22, m<br>2.74-2.81, m          | 30.2  | 1.82-1.85, m<br>1.72-1.75, m |
| 22 | 27.3  | 1.88-1.92, m<br>2.12-2.25, m | 27.3  | 1.84-1.92, m<br>2.20-2.29, m                      | 30.3  | 2.44-2.47, m<br>2.91-2.95, m          | 20.6  | 2.21-2.24, m<br>2.10-2.13, m |
| 23 | 139.7 |                              | 43.7  | 3.14-3.21, m                                      | 126.0 |                                       | 141.2 |                              |
| 24 | 30.4  | 2.56-2.61, m                 | 149.9 |                                                   | 135.1 |                                       | 31.1  | 2.56-2.64, m                 |
| 25 | 21.7  | 1.01, d, (6.6)               | 111.1 | 4.85, dd, (2.7, 2.7)<br>4.80, d, (1.8)            | 109.3 | 7.08, s                               | 22.0  | 0.83, d, (6.9)               |
| 26 | 20.0  | 0.95, d, (7.3)               | 22.4  | 1.51, s                                           | 20.7  | 2.38, s                               | 20.9  | 0.97, d, (6.8)               |
| 27 | 19.2  | 0.83, d, (6.8)               | 19.4  | 1.30, d, (7.1)                                    | 19.2  | 0.67, d, (7.5)                        | 18.2  | 1.09, d, (7.5)               |
| 28 | 19.4  | 1.15, d, (7.3)               | 18.2  | 1.05, d, (6.8)                                    | 19.6  | 1.25, d, (6.7)                        | 15.9  | 0.76, d, (6.8)               |
| 29 | 13.3  | 1.28, s                      | 13.5  | 1.27, s                                           | 13.2  | 1.41, s                               | 18.2  | 1.00, s                      |
| NH |       | 8.08, brs                    |       | 7.95, s                                           |       | 8.06, s                               |       | 8.05, brs                    |

<sup>1</sup>H (600 MHz) and <sup>13</sup>C (150 MHz) NMR data of **5**, **6** in Chloroform-*d*<sub>3</sub>, and <sup>1</sup>HNMR **3**, **4** in Chloroform-*d*<sub>3</sub>, <sup>13</sup>CNMR in DMSO-*d*<sub>6</sub>.

MZZ48-20 #22 RT: 0.10 AV: 1 NL: 7.64E8  
T: FTMS + p ESI Full ms [100.0000-1500.0000]

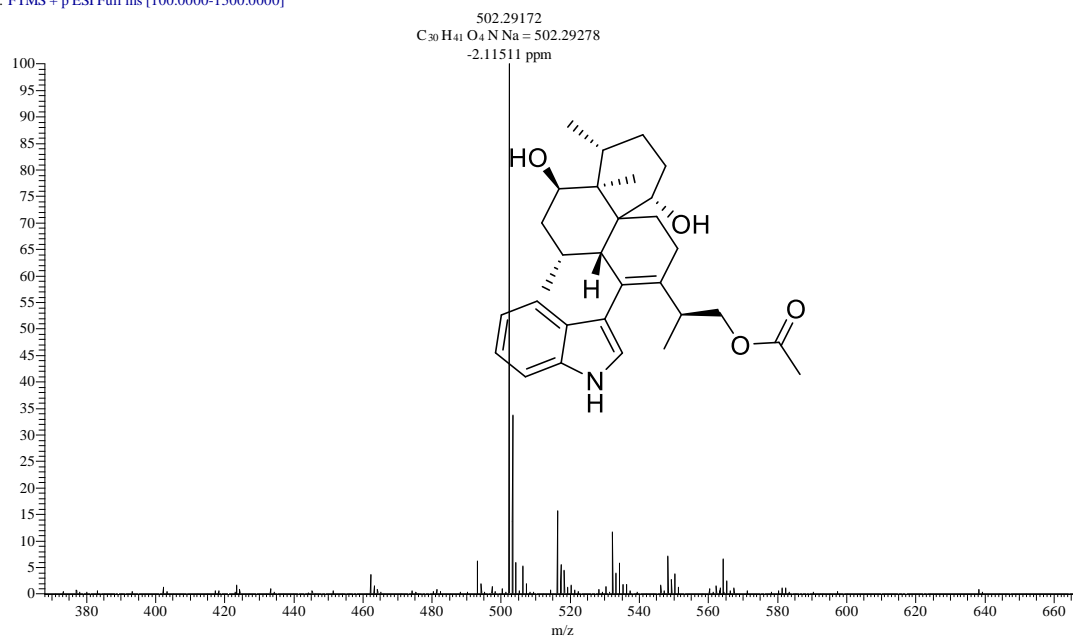

Figure 1 shows the  $^1\text{H}$  NMR spectra of compound **1**. The top spectrum is the  $^1\text{H}$  NMR in  $\text{CDCl}_3$ , and the bottom spectrum is the  $^1\text{H}$  NMR in  $\text{DMSO}-d_6$ . The chemical structure of compound **1** is shown on the right.

Figure S3.  $^{13}\text{C}$ -NMR spectrum of compound **1** in  $\text{DMSO}-d_6$  (150 MHz).

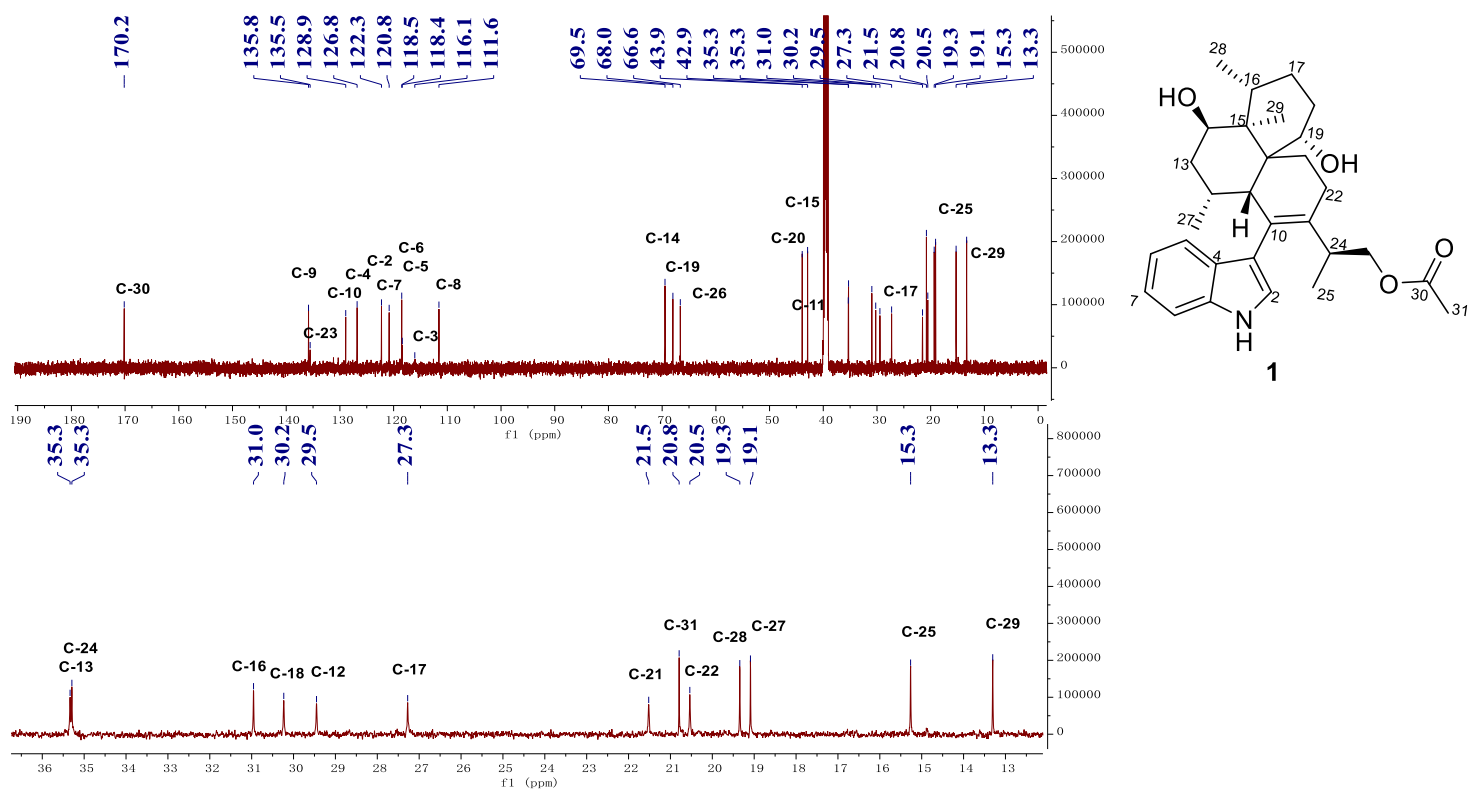

Figure S4. HSQC spectrum of compound **1** in  $\text{DMSO}-d_6$  (600\*150 MHz).

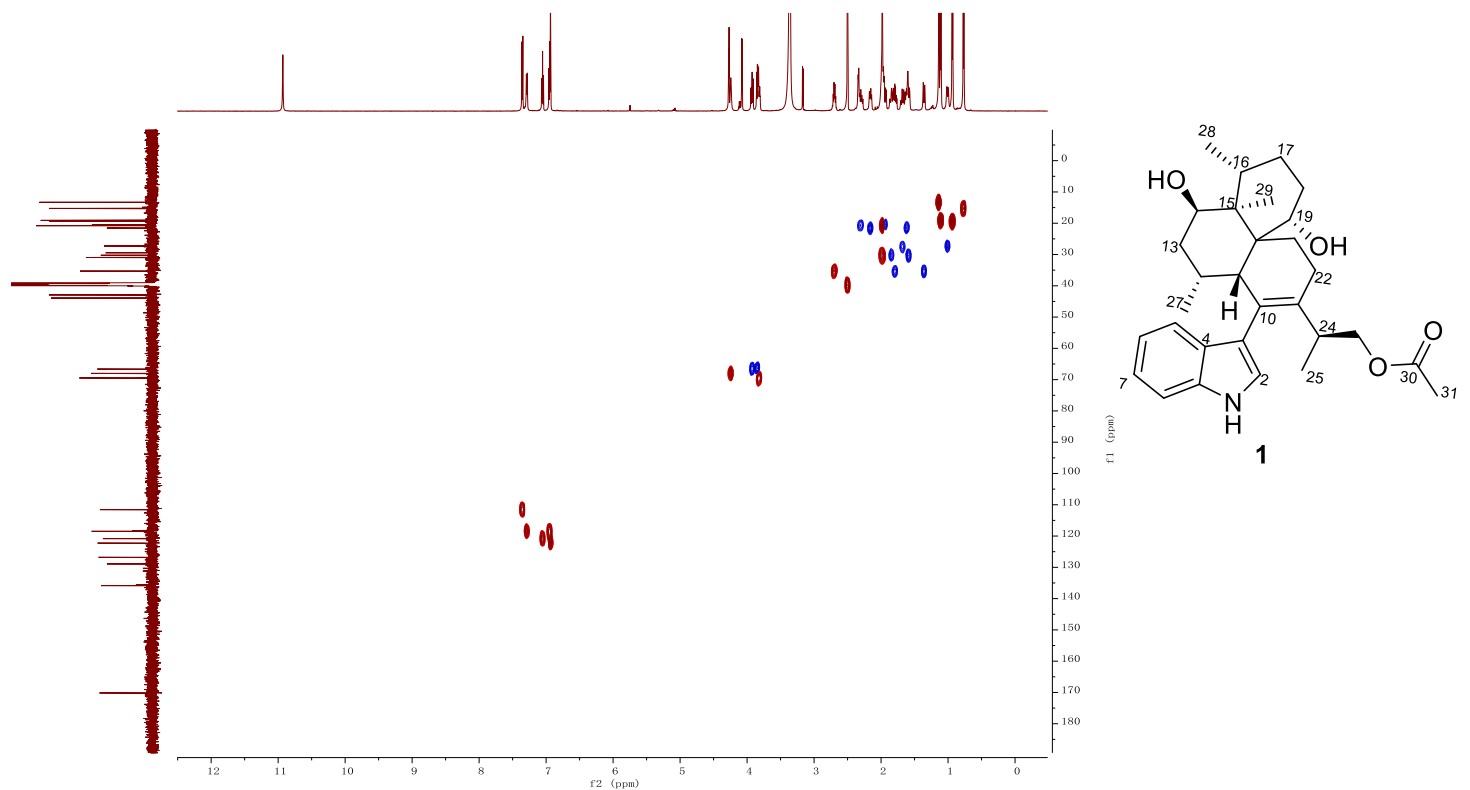

**Figure S5.** HMBC spectrum of compound **1** in DMSO-*d*<sub>6</sub> (600\*150 MHz).

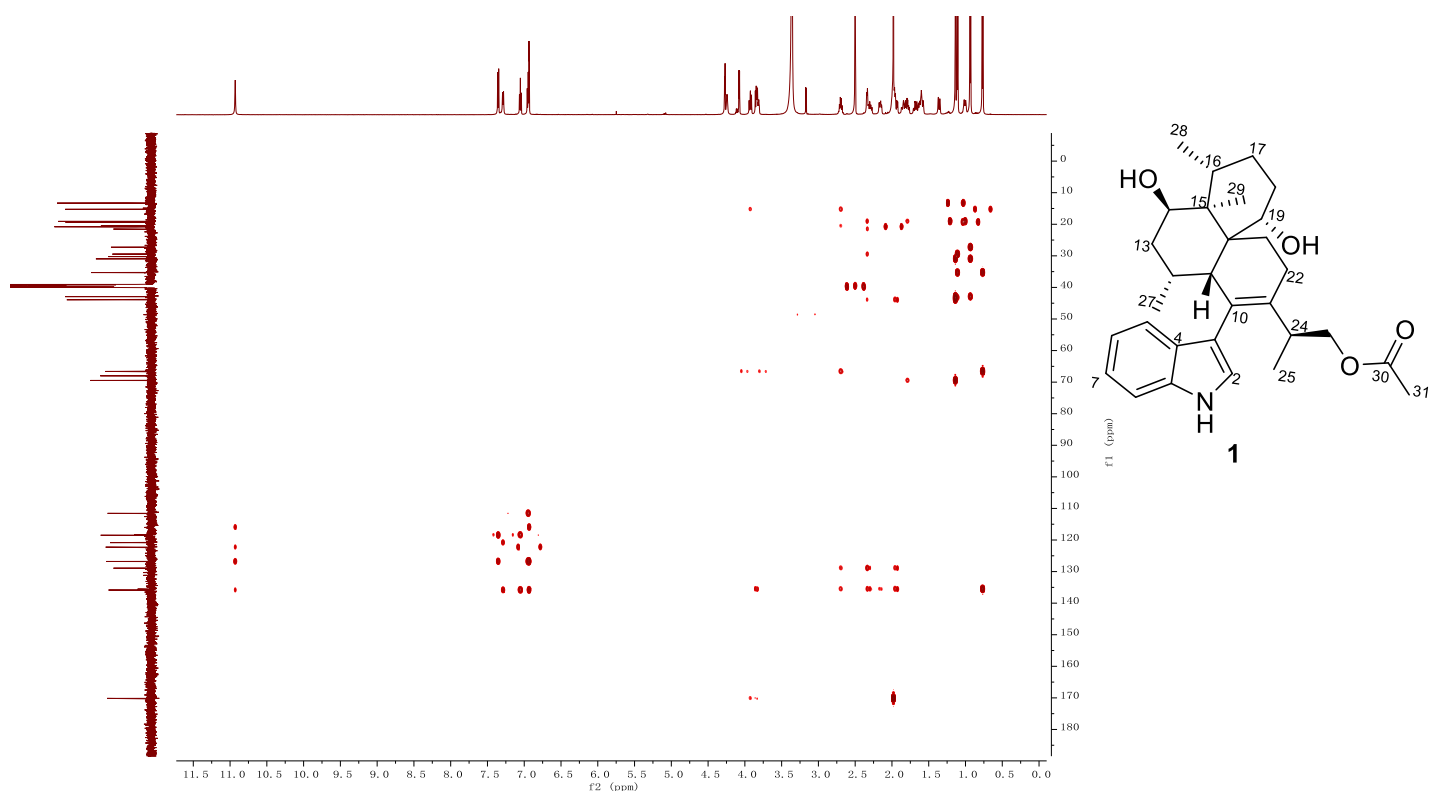

**Figure S6.** <sup>1</sup>H-<sup>1</sup>H COSY spectrum of compound **1** in DMSO-*d*<sub>6</sub> (600 MHz).

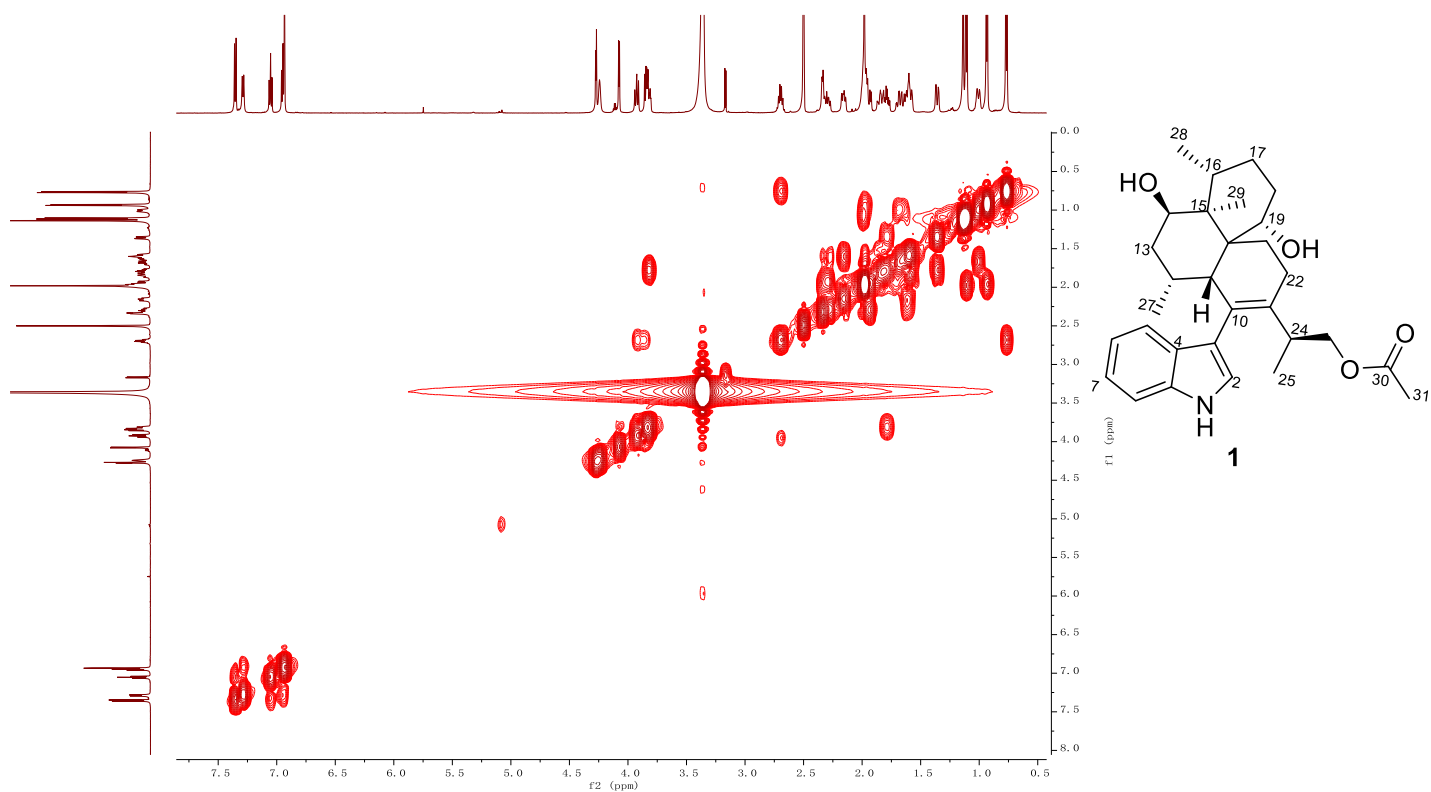



**Figure S7.** NOESY spectrum of compound **1** in DMSO-*d*<sub>6</sub> (600 MHz).

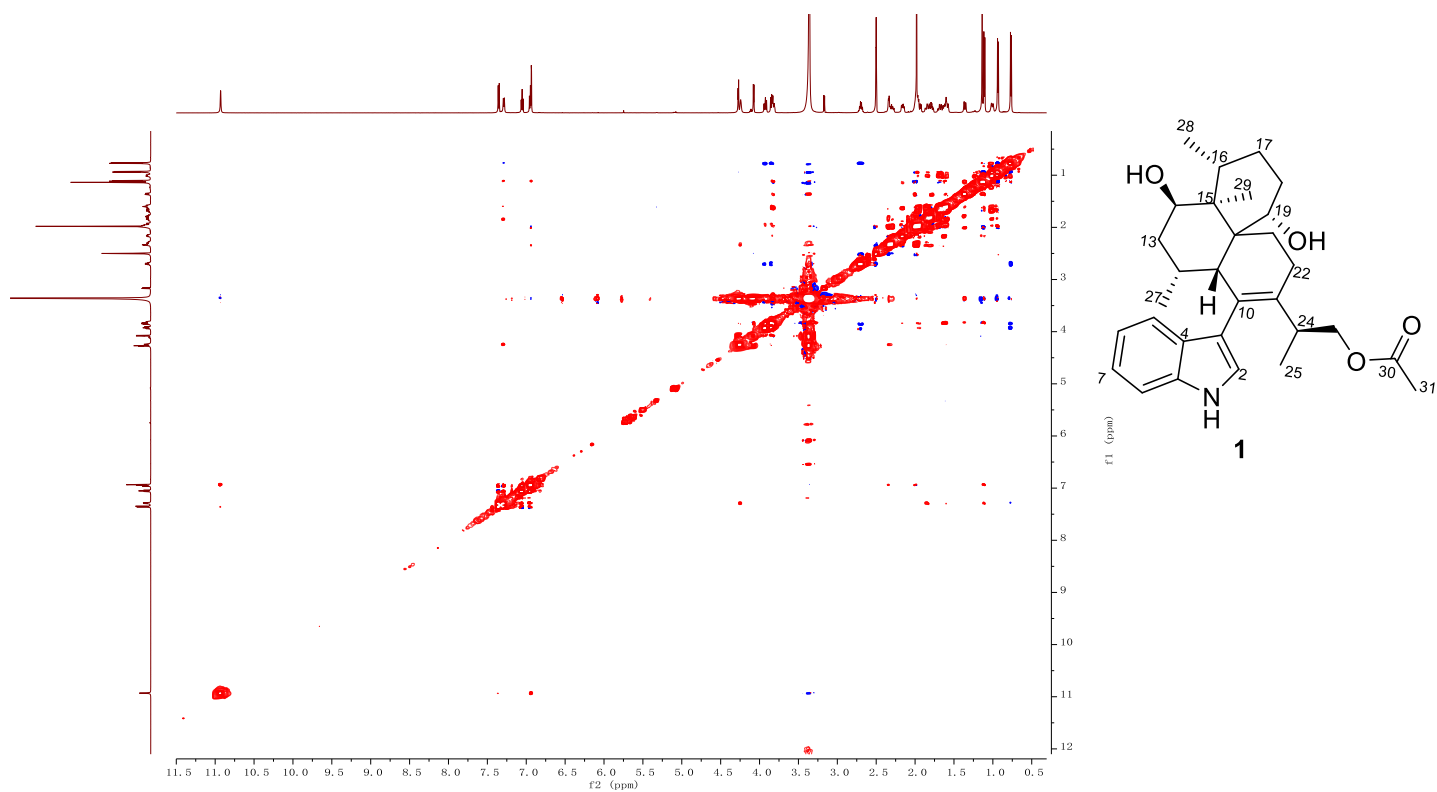

**Figure S8.** <sup>1</sup>H-NMR spectrum of compound **2** in DMSO-*d*<sub>6</sub> (600 MHz).

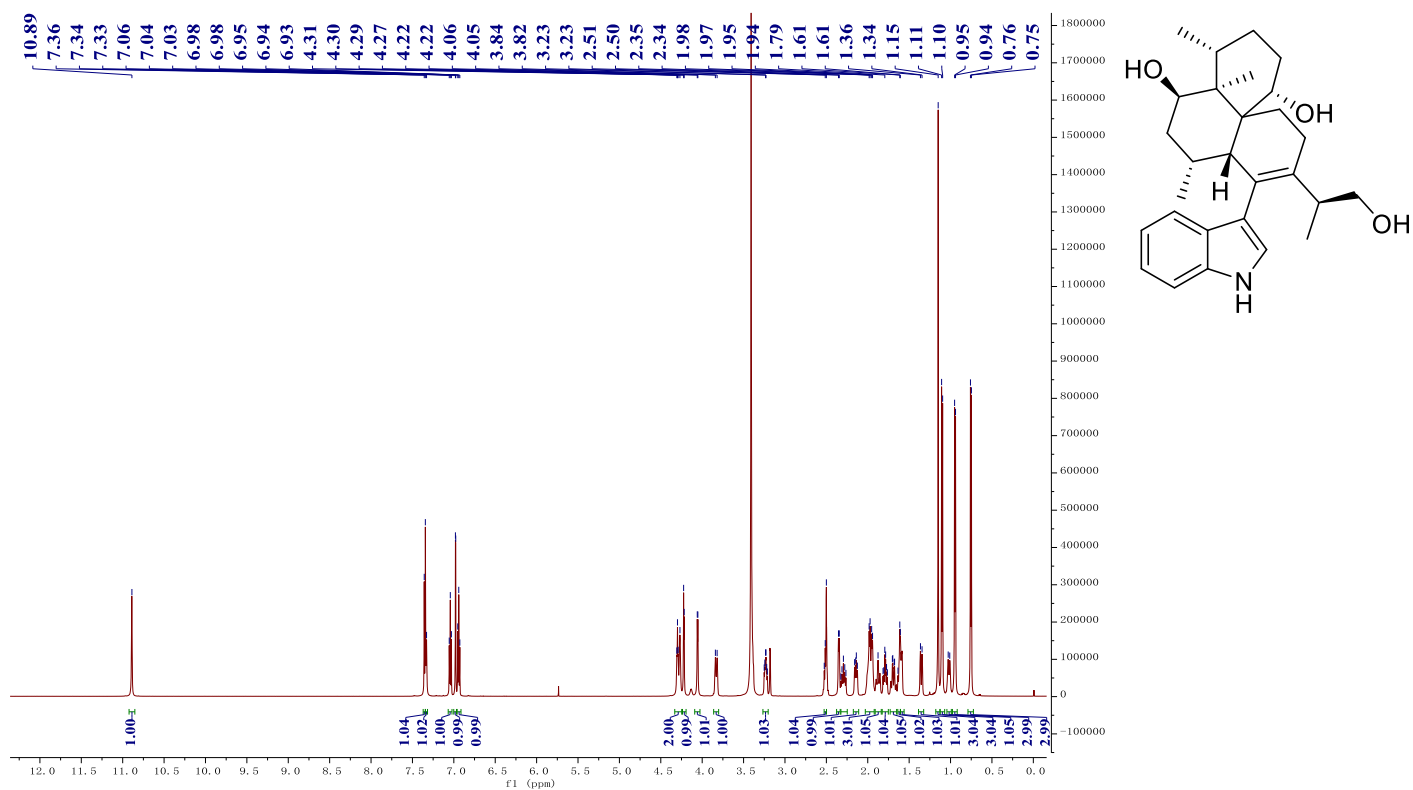

**Figure S9.**  $^{13}\text{C}$ -NMR spectrum of compound **2** in  $\text{DMSO}-d_6$  (150 MHz).

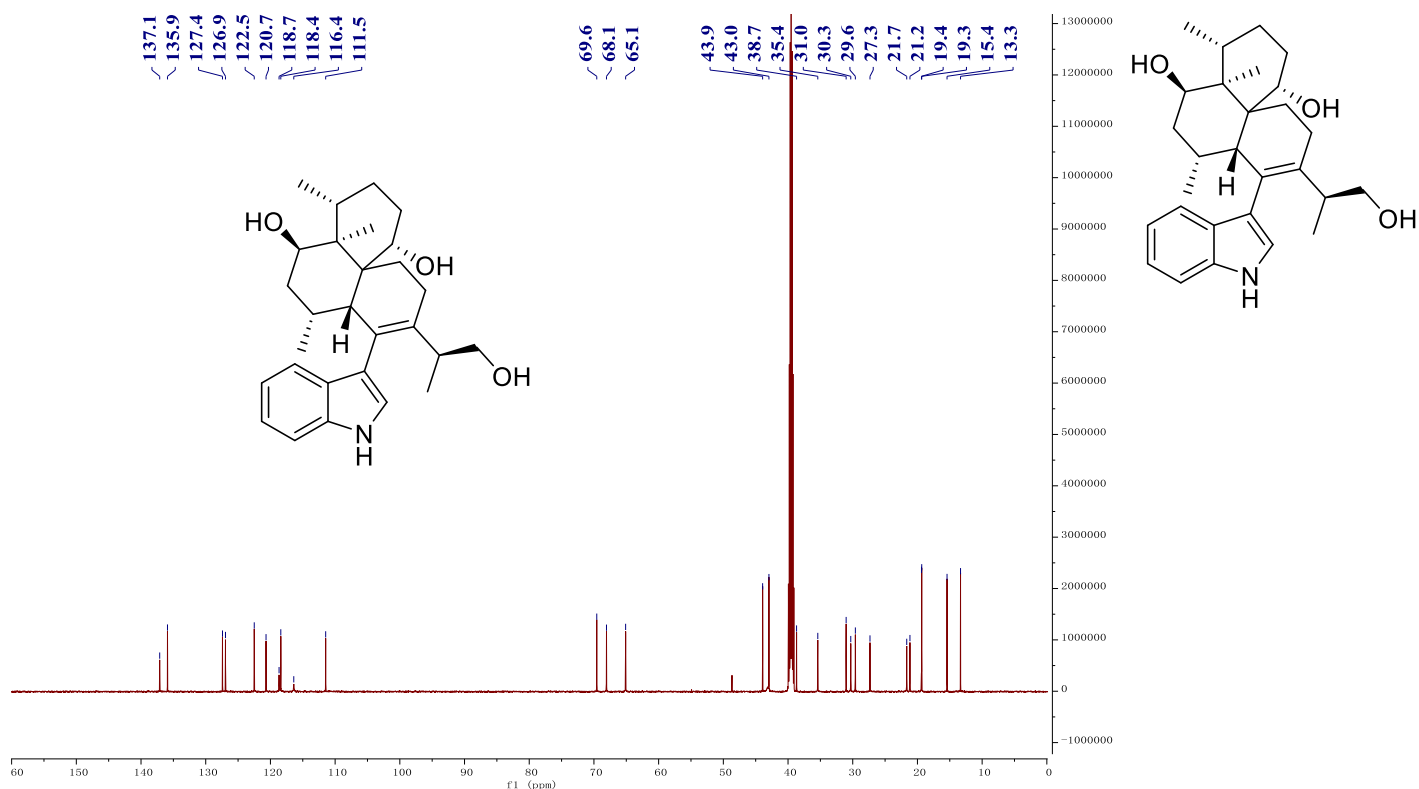

**Figure S10.**  $^1\text{H}$ -NMR spectrum of compound **3** in  $\text{Chloroform}-d_3$  (600 MHz).

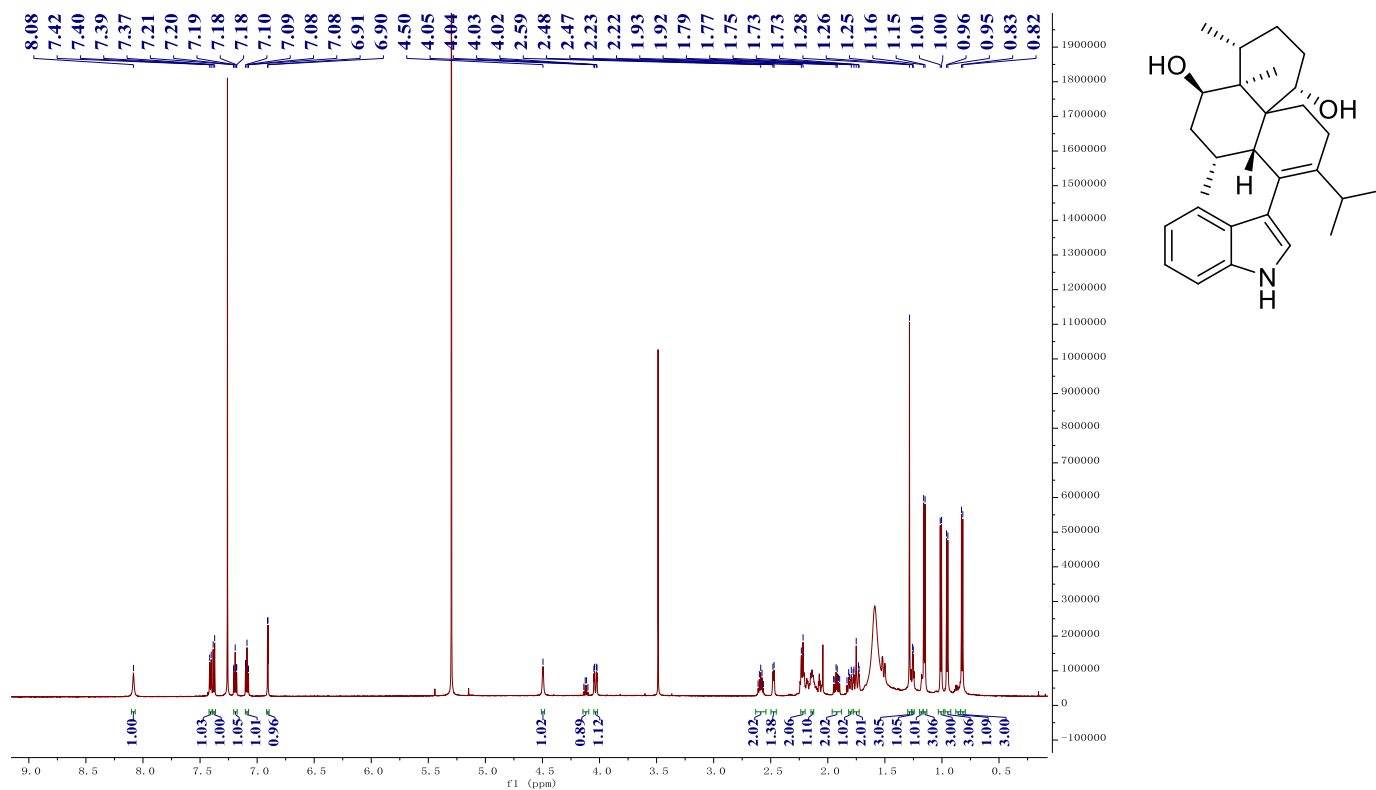

**Figure S11.**  $^{13}\text{C}$ -NMR spectrum of compound **3** in  $\text{DMSO}-d_6$  (150 MHz).

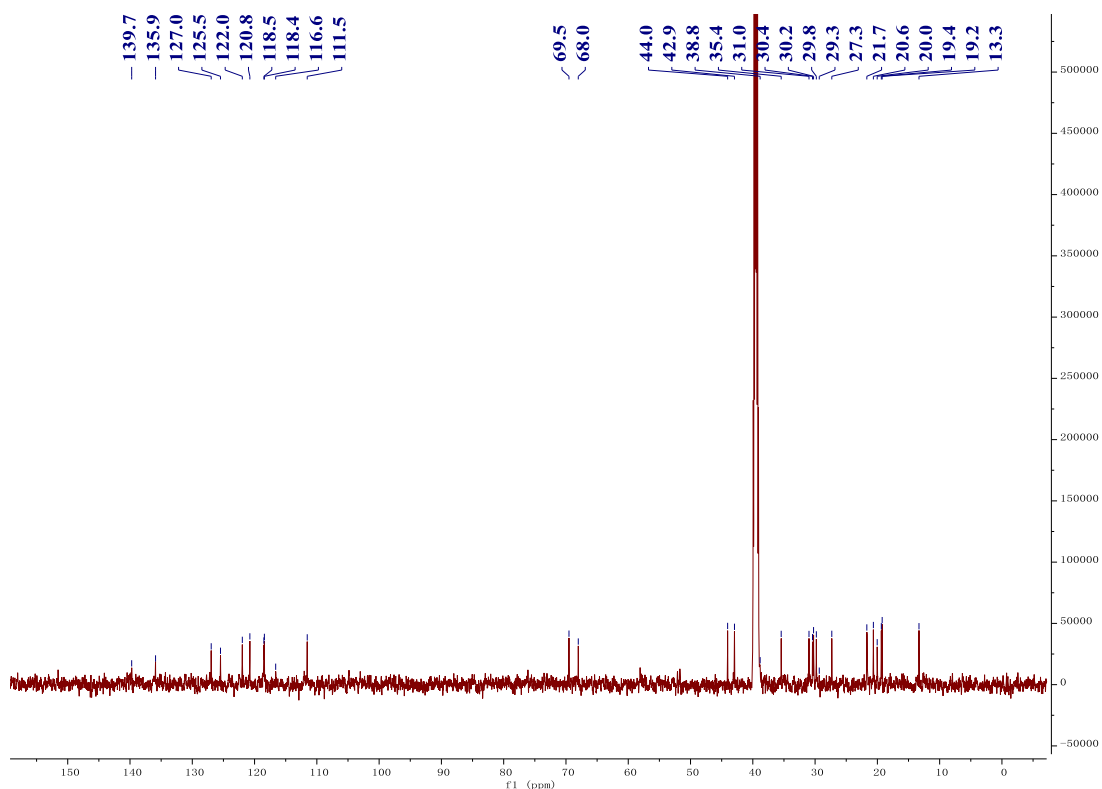

**Figure S12.**  $^1\text{H}$ -NMR spectrum of compound **4** in  $\text{Chloroform}-d_3$  (600 MHz).

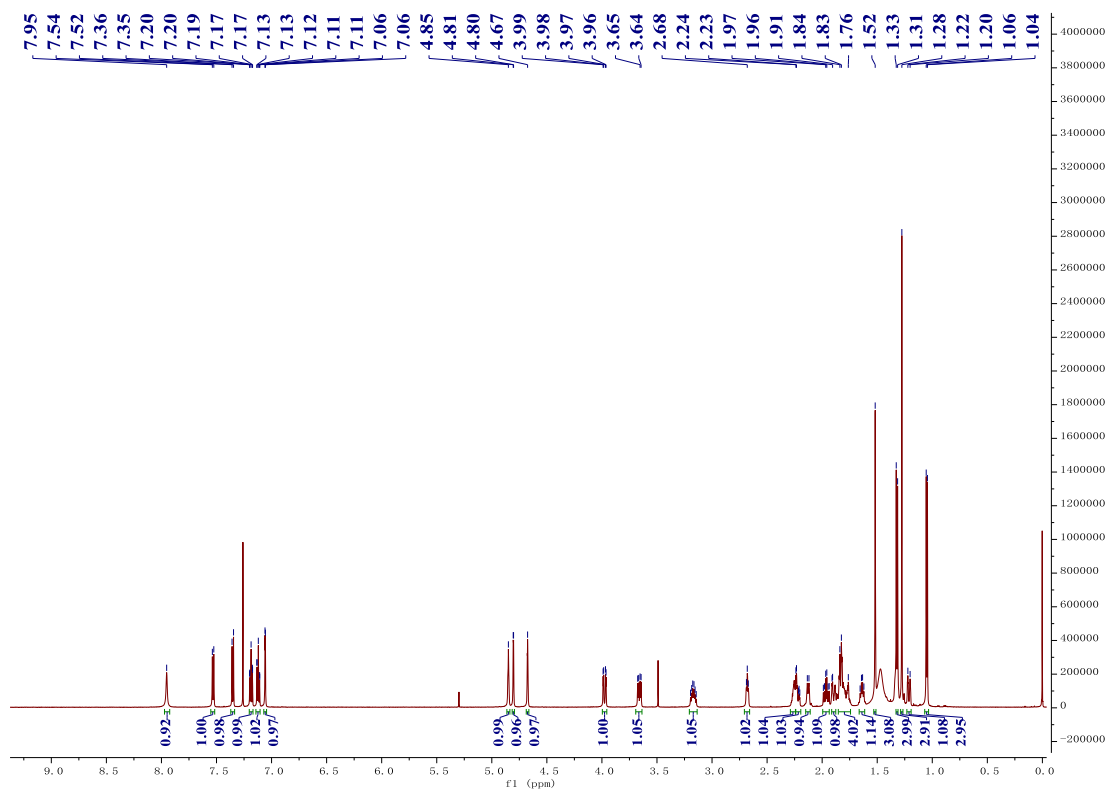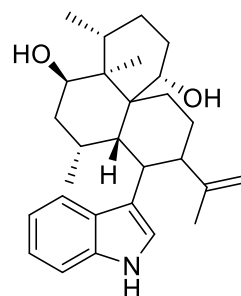

**Figure S13.**  $^{13}\text{C}$ -NMR spectrum of compound **4** in  $\text{DMSO-}d_6$  (150 MHz).

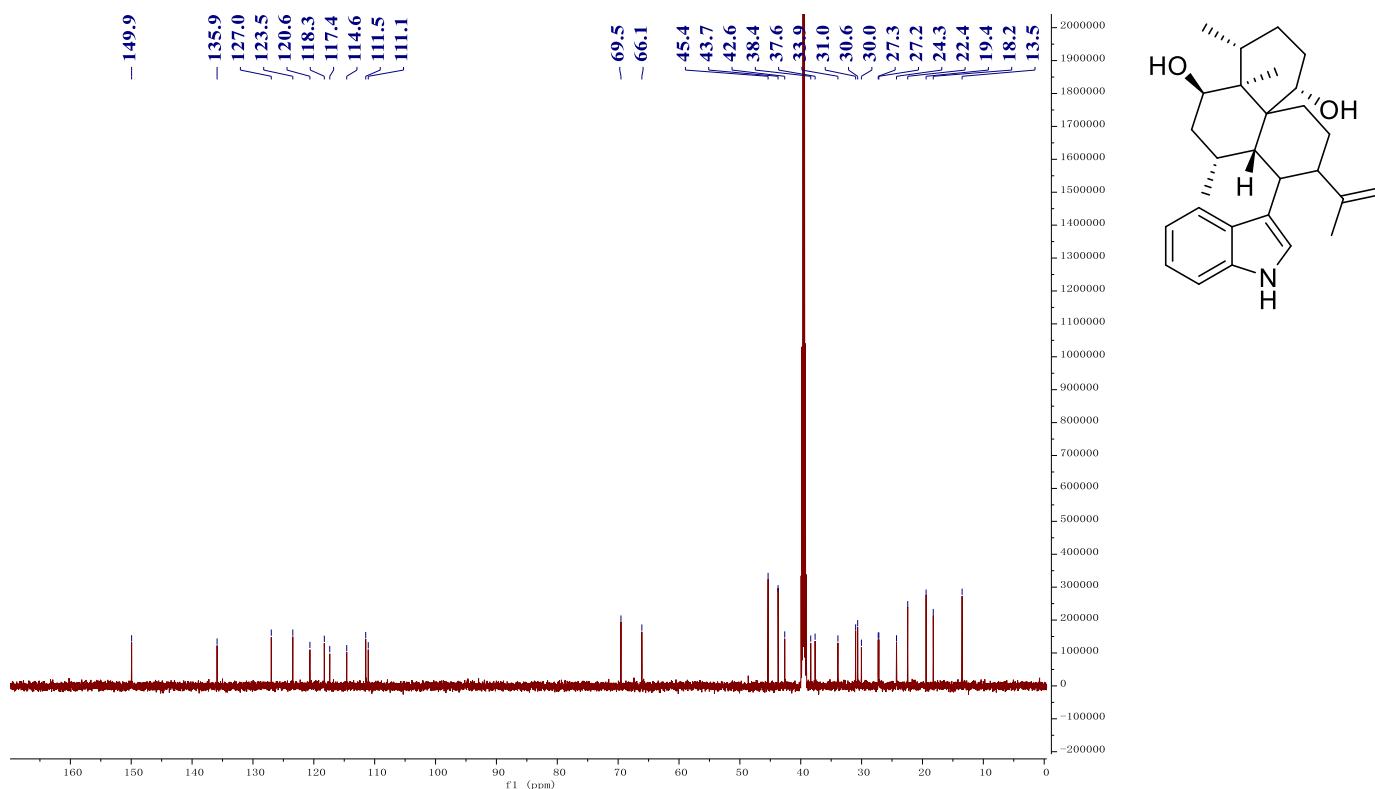

**Figure S14.**  $^1\text{H}$ -NMR spectrum of compound **5** in  $\text{Chloroform-}d_3$  (600 MHz).

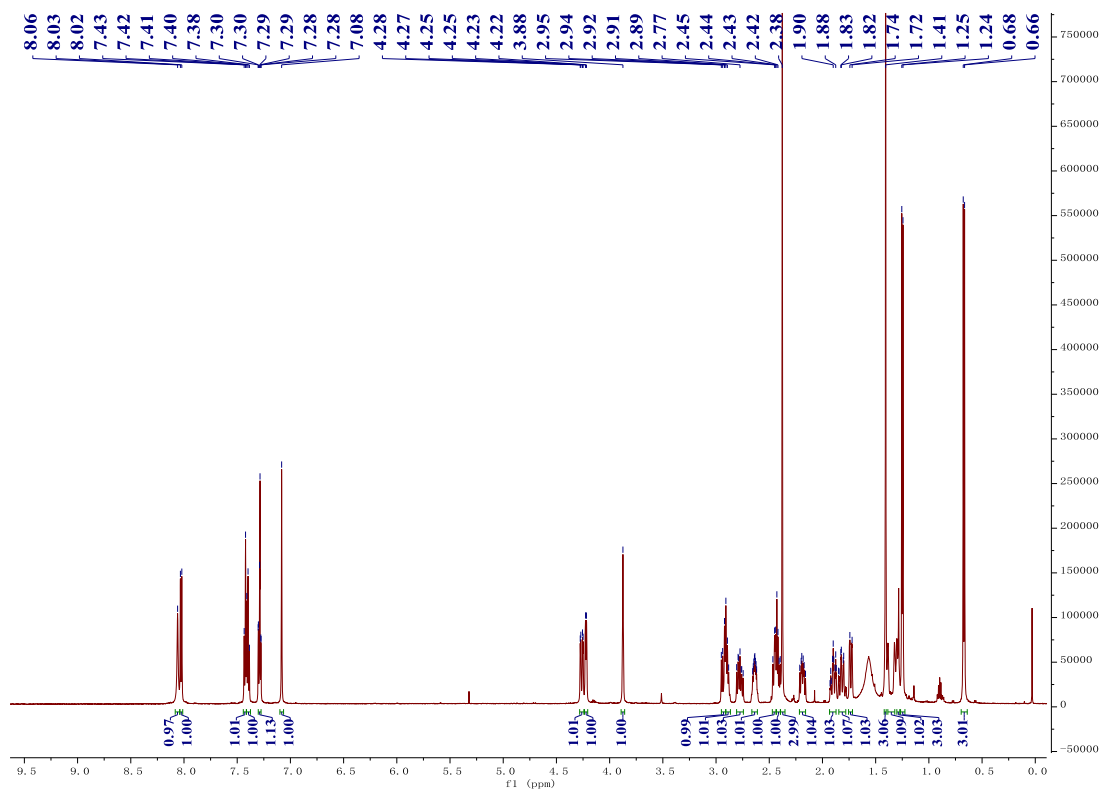

**Figure S15.**  $^{13}\text{C}$ -NMR spectrum of compound **5** in Chloroform- $d_3$  (150 MHz).

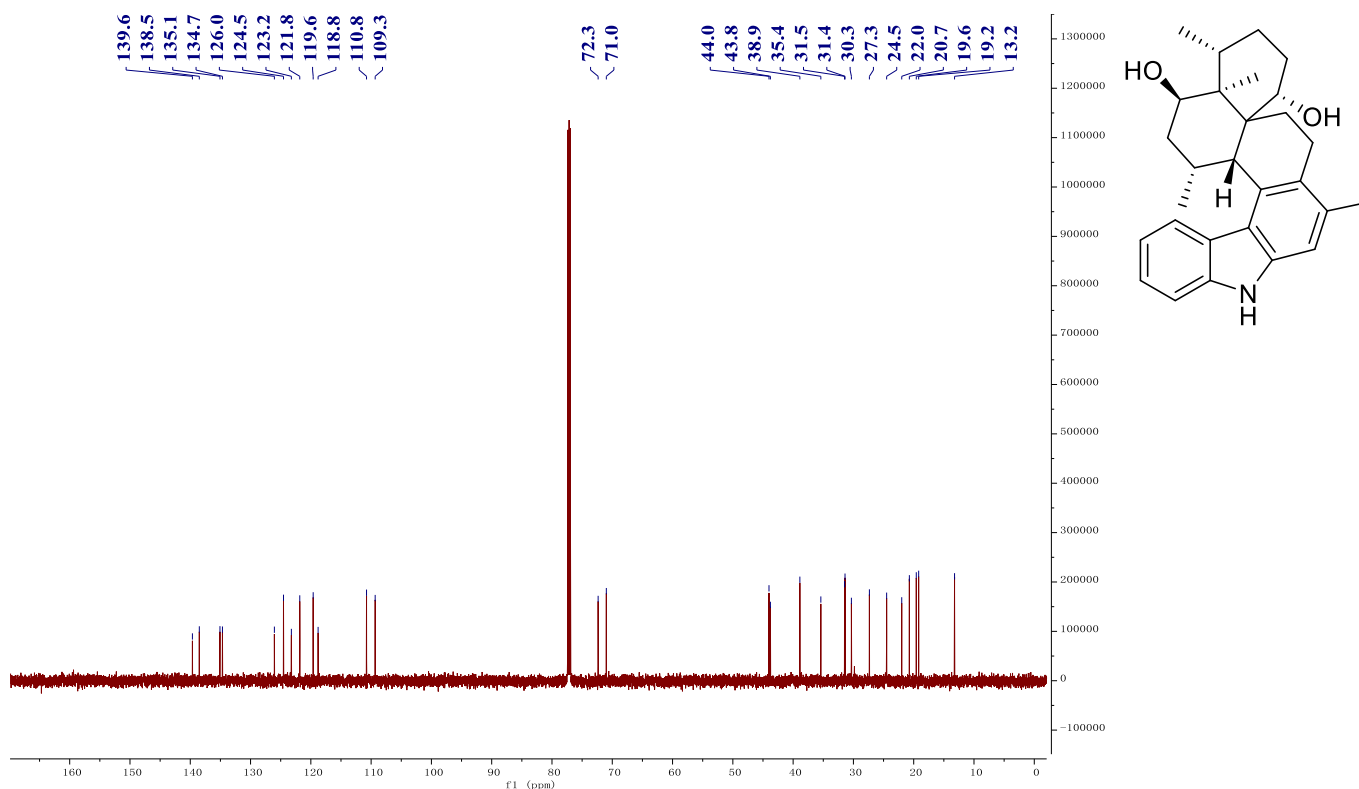

**Figure S16.**  $^1\text{H}$ -NMR spectrum of compound **6** in Chloroform- $d_3$  (600 MHz).

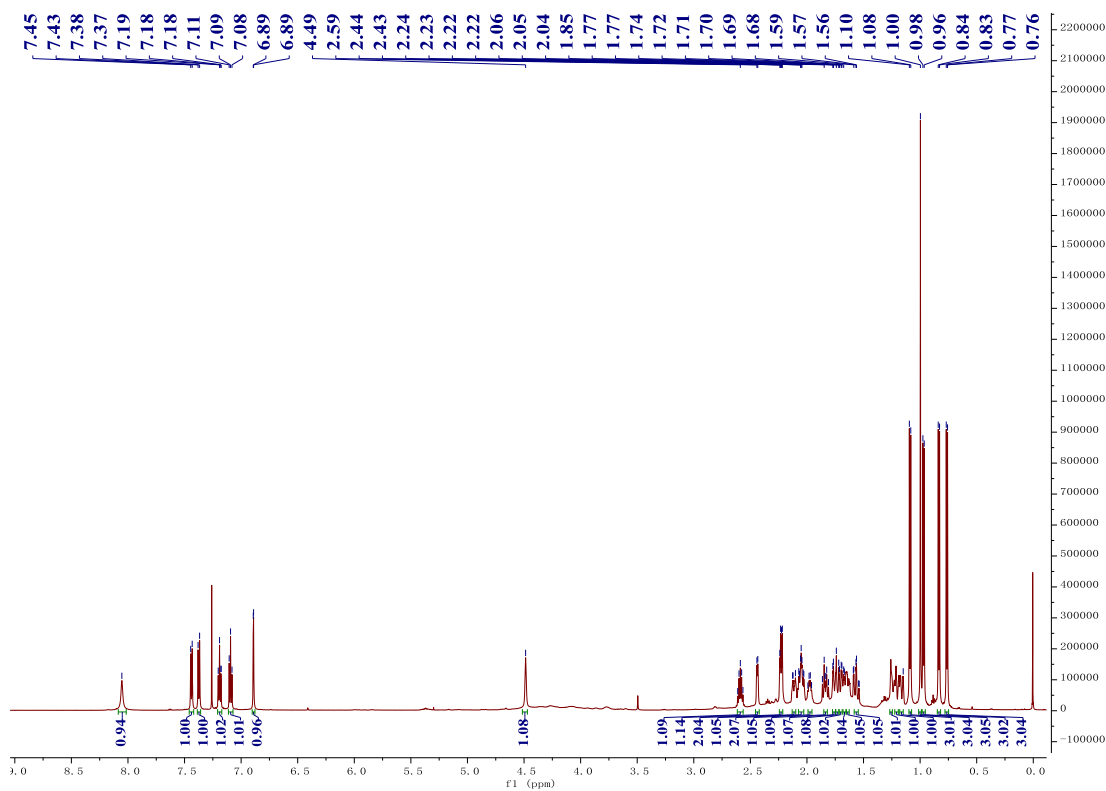

**Figure S17.**  $^{13}\text{C}$ -NMR spectrum of compound **6** in Chloroform- $d_3$  (150 MHz).

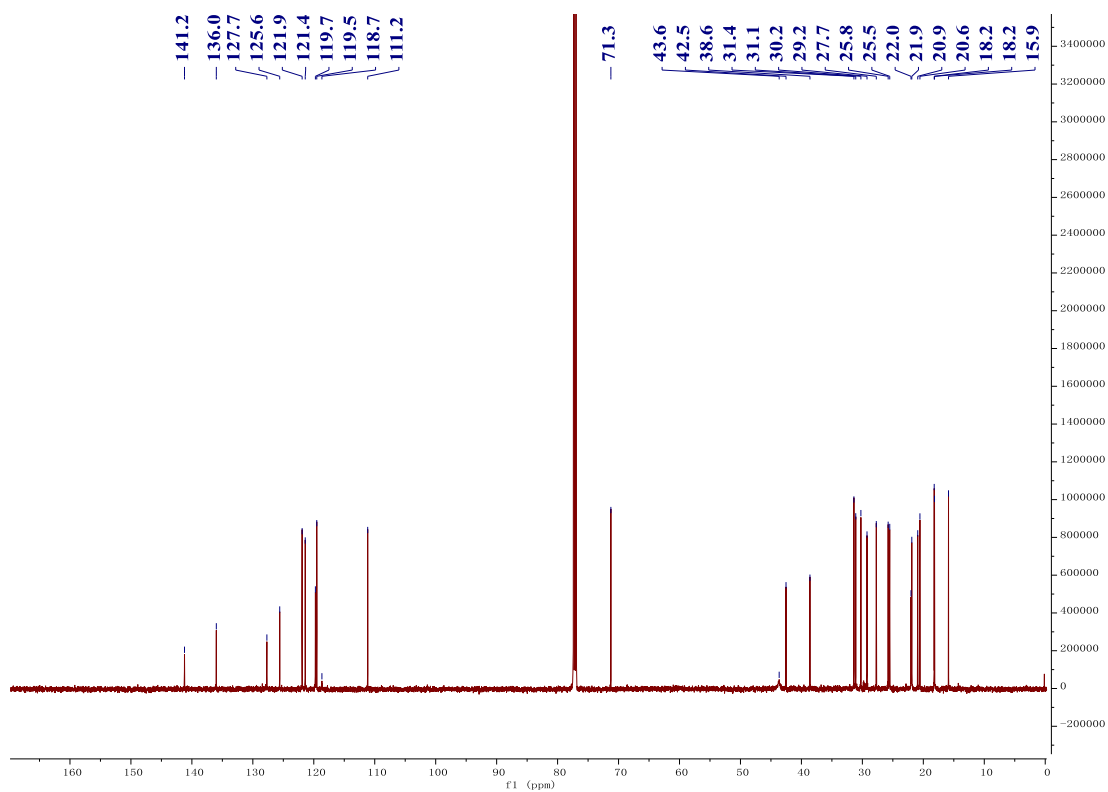

**Figure S18.**  $^1\text{H}$ -NMR spectrum of hydrolysate of compound **1** in DMSO- $d_6$  (600 MHz).

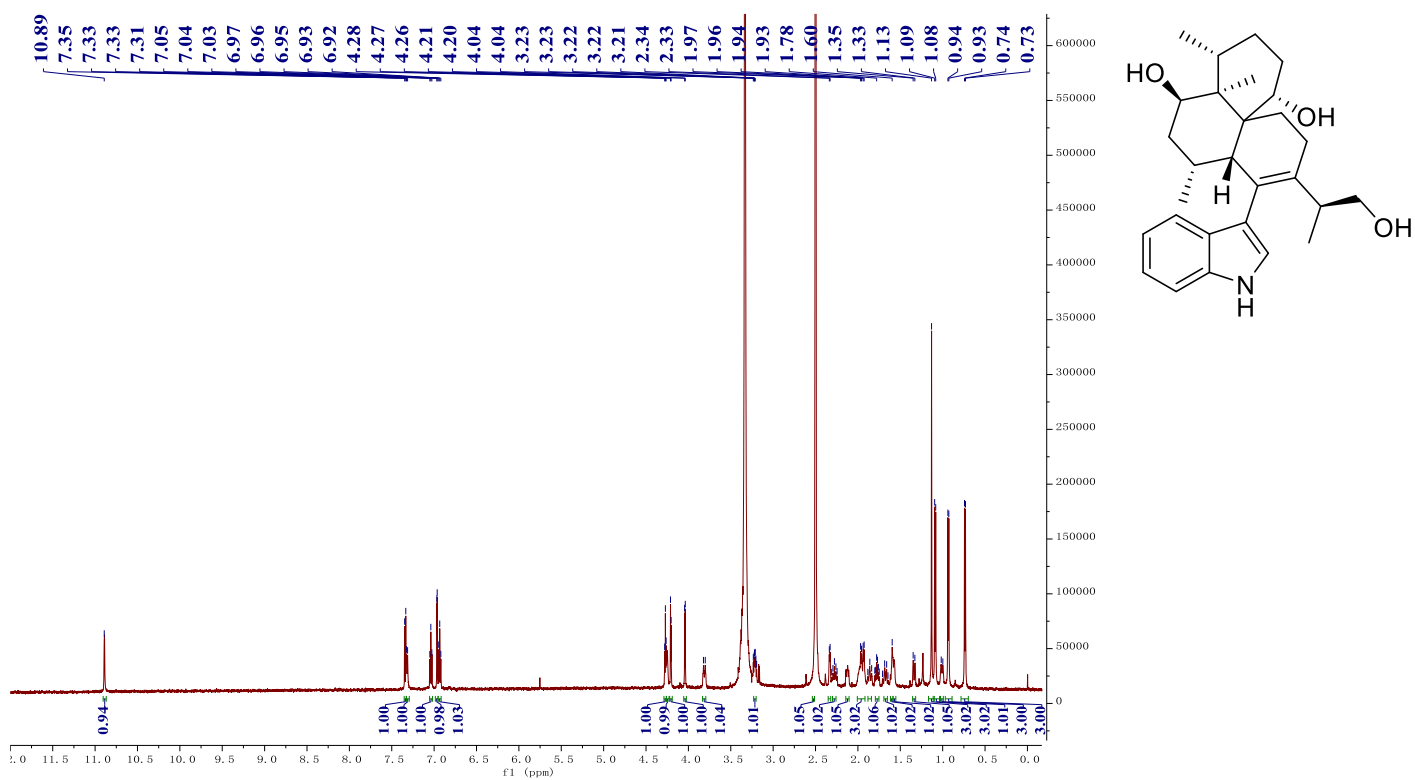

Supplement: s1 [file s1]
